# Supplementary material
Source: Springer Nature journal article supplement (https://www.springermedizin.de/resource/supplementary/12936_2013_2881_MOESM2_ESM.pdf/9544502)
Supplement: MOESM2 [file 9544502]

## Additional File 2: Use of available ITNs by pregnant women

| Author                                         | Year | Country      | Type          | n=           | Data Source                                                   | ITN OWNERSHIP (at least 1 ITN/HH)                             | AVAILABLE ITN USE (use in HH owning >= 1 ITN)                                                     | Coverage *                                                    |
|------------------------------------------------|------|--------------|---------------|--------------|---------------------------------------------------------------|---------------------------------------------------------------|---------------------------------------------------------------------------------------------------|---------------------------------------------------------------|
| <b>NATIONAL HOUSEHOLD SURVEY DATA</b>          |      |              |               |              |                                                               |                                                               |                                                                                                   |                                                               |
| Eisele <i>et al</i> [10]                       | 2009 | Africa       | Cross section | N/A          | DHS and MIS data 2003-2007 from 15 Nations.                   | 100% HH (for analysis)                                        | Kenya 82%, DRC 73%, Rwanda 79%, Tanzania 72%, Zimbabwe 29%, Ethiopia 32%, Senegal 38%, Malawi 52% |                                                               |
| Baume <i>et al</i> [36]                        | 2008 | Africa       | Cross section | N/A          | Coverage of ITNs from 2000-2004 from HH surveys in 4 nations. | Nigeria 0-9%<br>Senegal 8-39%<br>Zambia 6-35%<br>Uganda 1-21% | Nigeria 49% *(2004)<br>Senegal 80% *<br>Zambia 39% *<br>Uganda 64% *                              | Nigeria 0-4%<br>Senegal 5-31%<br>Zambia 0-14%<br>Uganda 1-13% |
| Baume <i>et al</i> [18]                        | 2007 | Africa       | Cross section | N/A          | Coverage of ITNs from 2000-2004 from DHS in 6 Nations.        | 100% HH (for analysis)                                        | Ghana 69%, Mali 66%, Zambia 51%, Ethiopia 32%                                                     |                                                               |
| Graves <i>et al</i> [16]                       | 2011 | Ethiopia     | Longitudinal  | 240p<br>232p | Data from 2006 MIS and sample of HH in 2007.                  | 100% HH (for analysis)                                        | 84% (2006)<br>59% (2007)                                                                          |                                                               |
| Jima <i>et al</i> [38]                         | 2010 | Ethiopia     | Cross section | 570p         | 2007 MIS Results.                                             | 66% HH                                                        | 66%                                                                                               | 44%                                                           |
| Auta <i>et al</i> [21]                         | 2012 | Nigeria      | Cross section |              | 2008 DHS.                                                     | 8% HH                                                         | 44%                                                                                               | 4%                                                            |
| Amzat <i>et al</i> [56]                        | 2011 | Nigeria      | Cross section |              | 2008 DHS + other data                                         | 8%                                                            | 63% *                                                                                             | 5%                                                            |
| Steketee <i>et al</i> [71]                     | 2008 | Zambia       | Cross section |              | 2006 DHS                                                      | 44%                                                           | 55% *                                                                                             | 24%                                                           |
| <b>DATA FROM OBSERVATIONAL STUDIES</b>         |      |              |               |              |                                                               |                                                               |                                                                                                   |                                                               |
| Deressa <i>et al</i> [17]                      | 2011 | Ethiopia     | Cross section | 2874         | HH survey in 2 districts.                                     | 49% HH                                                        | 52%                                                                                               | 25%                                                           |
| Graves <i>et al</i> [40]                       | 2009 | Ethiopia     | Cross section | 207p         | Modified MIS in from 3 districts.                             | 20% in HH                                                     | 95% *                                                                                             | 19%                                                           |
| Belay <i>et al</i> [41]                        | 2008 | Ethiopia     | Cross section | 815p         | Community based HH survey.                                    | 34% HH                                                        | 58%                                                                                               | 20%                                                           |
| Njoroje <i>et al</i> [46]                      | 2009 | Kenya        | Cross section | 220p         | Survey of women attending ANC.                                | 75%                                                           | 70%                                                                                               | 53%                                                           |
| Aluko <i>et al</i> [54]                        | 2012 | Nigeria      | Cross section | 335p         | Surveys of women at fee-paying hospitals.                     | 44%                                                           | 72%                                                                                               | 32%                                                           |
| Ankomah <i>et al</i> [19]                      | 2012 | Nigeria      | Cross section | 2348p        | HH surveys of pregnant women.                                 | 29%                                                           | 26%                                                                                               | 8%                                                            |
| Aina <i>et al</i> [72]                         | 2011 | Nigeria      | Cross section | 163p         | Survey of women attending ANC.                                | 16-55 %                                                       | 68-71%                                                                                            | 11-37%                                                        |
| Wagbatsoma <i>et al</i> [58]                   | 2010 | Nigeria      | Cross section | 385p         | Survey of women attending ANC.                                | 9% HH                                                         | 86%                                                                                               | 8%                                                            |
| Afolabi <i>et al</i> [59]                      | 2009 | Nigeria      | Cross section | 78p          | HH survey in 2 rural regions.                                 | 22-49%                                                        | 58-90% *                                                                                          | 29-28%                                                        |
| Ambrose <i>et al</i> [67]                      | 2011 | Tanzania     | Cross section | 222p         | Survey of women attending ANC.                                | 78%                                                           | 87%                                                                                               | 68%                                                           |
| Sangare <i>et al</i> [70]                      | 2012 | Uganda       | Cross section | 500p         | HH survey of pregnant/post partum women.                      | 72% 1st TM<br>+20% 2nd TM                                     | 73%                                                                                               | 67%                                                           |
| <b>BASELINE DATA FROM INTERVENTION STUDIES</b> |      |              |               |              |                                                               |                                                               |                                                                                                   |                                                               |
| Muller <i>et al</i> [30]                       | 2008 | Burkina Faso | Cluster RCT   | 107p<br>105p | Baseline data from 2 rural clusters in a RCT.                 | 21-25%                                                        | 20-24% *                                                                                          | 5% (both clusters)                                            |
| Pettifor <i>et al</i> [37]                     | 2008 | DRC          | Longitudinal  | 351p         | Baseline data from a wider longitudinal study.                | 33%                                                           | 76% *                                                                                             | 25%                                                           |
| Deribew <i>et al</i> [22]                      | 2010 | Ethiopia     | Cross section | 242p         | Baseline results from a cluster RCT.                          | 70%                                                           | 80%-100% *                                                                                        | 56- 75%                                                       |
| Mathanga <i>et al</i> [51]                     | 2009 | Malawi       | Longitudinal  | 78p<br>149p  | Baseline data from a rural intervention study.                | 41-57%                                                        | 49-66% *                                                                                          | 22-29%                                                        |
| Thwing <i>et al</i> [32]                       | 2008 | Niger        | Longitudinal  | 254p         | Baseline data from a campaign evaluation.                     | 6%                                                            | 55% *                                                                                             | 31%                                                           |
| Hanson <i>et al</i> [69]                       | 2009 | Tanzania     | Cross section | 779p         | Baseline data from a voucher evaluation.                      | 18%                                                           | 61% *                                                                                             | 11%                                                           |

**Legend:** NA not available, DRC Democratic Republic of Congo, HH Household, p pregnant, MIS Malaria Indicator survey, TM trimester, *RCT* *Randomized Control Trial*. Where statistics have been presented, all have been rounded to the nearest whole number.

\*Calculated from available data using formula [% coverage= % ownership x % available ITN use]
